# Supplementary material for: Trainee-led Engagement of the Care Team Improves Application of an Institutional Blood Culture Clinical Decision Algorithm to Pediatric Oncology Inpatients: A Single-institution Quality Improvement Project
Source: PubMed Central journal article supplement — Pediatr Qual Saf. 2022 Mar 30;7(2):e545. doi: 10.1097/pq9.0000000000000545 (PMC8970086; doi:10.1097/pq9.0000000000000545), 2022-03-30

Supplemental Figure 1

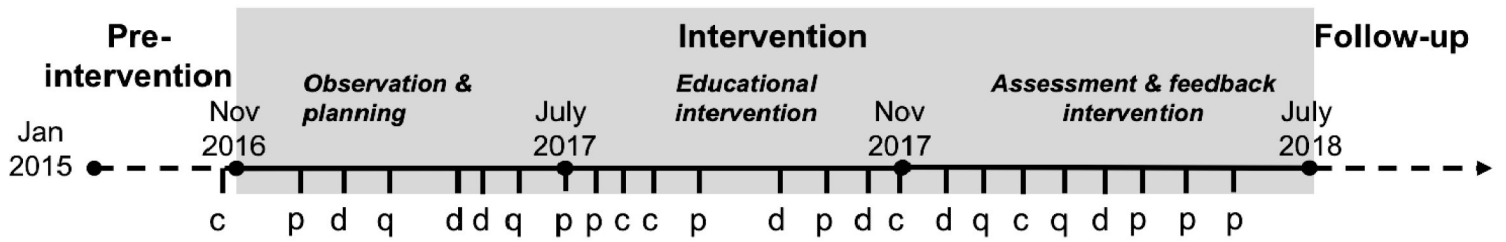

Supplemental Figure 1



Supplemental Figure 2

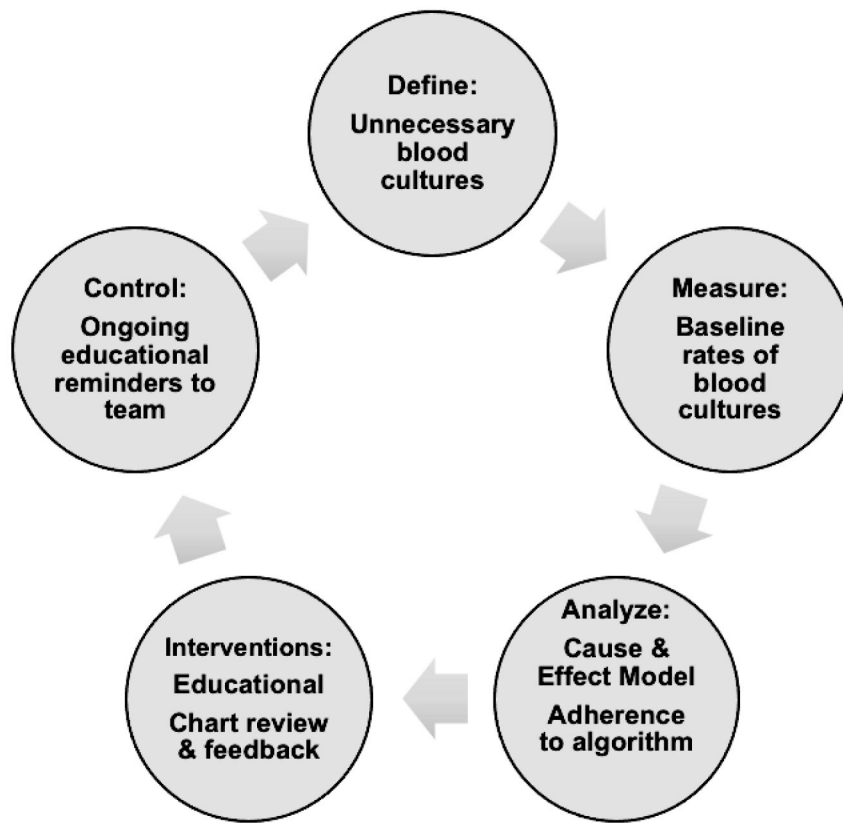

Supplemental Figure 2



### Supplemental Figure 3

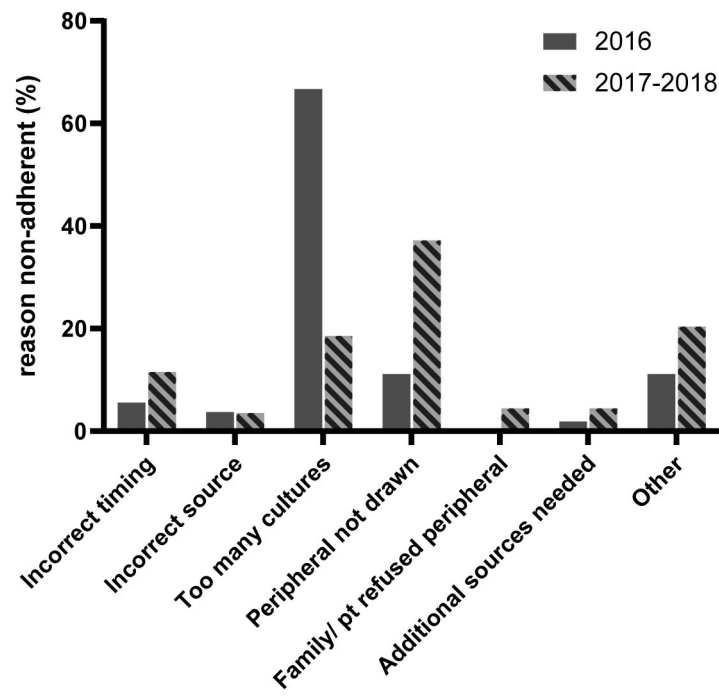

### Supplemental Figure 3



Supplemental Figure 4

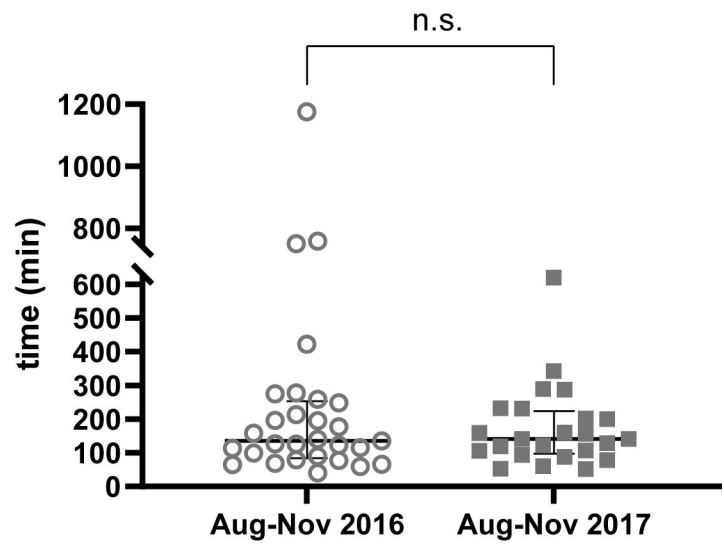

Supplemental Figure 4



Supplement: pqs-7-e545-s001.pdf [file pqs-7-e545-s001.pdf]
